# Supplementary material for: The effect of milling frequency on a mechanochemical organic reaction monitored by in situ Raman spectroscopy
Source: PubMed Central journal article supplement (PMC5669241; doi:10.3762/bjoc.13.216), 2017-10-18
Supplement: Beilstein_J_Org_Chem-13-2160-s001.pdf [file Beilstein_J_Org_Chem-13-2160-s001.pdf]

# Supporting Information

for

## The effect of milling frequency on a mechanochemical organic reaction monitored by in situ Raman spectroscopy

Patrick A. Julien<sup>1</sup>, Ivani Malvestiti<sup>1,2</sup> and Tomislav Friščić<sup>1\*</sup>

Address: <sup>1</sup>Department of Chemistry, McGill University, Montreal, QC, Canada and

<sup>2</sup>Departamento de Química Fundamental, Universidade Federal de Pernambuco, PE, Brazil

Email: Tomislav Friščić - tomislav.friscic@mcgill.ca

\* Corresponding author

### Experimental part

#### Table of Contents

|    |                                                          |    |
|----|----------------------------------------------------------|----|
| 1. | Selected Raman spectra of pure components                | S2 |
| 2. | Experimental setup                                       | S2 |
| 3. | Product characterization                                 | S3 |
| 4. | Spectroscopic data and fitting plots for all experiments | S6 |

## 1. Selected Raman spectra of pure components

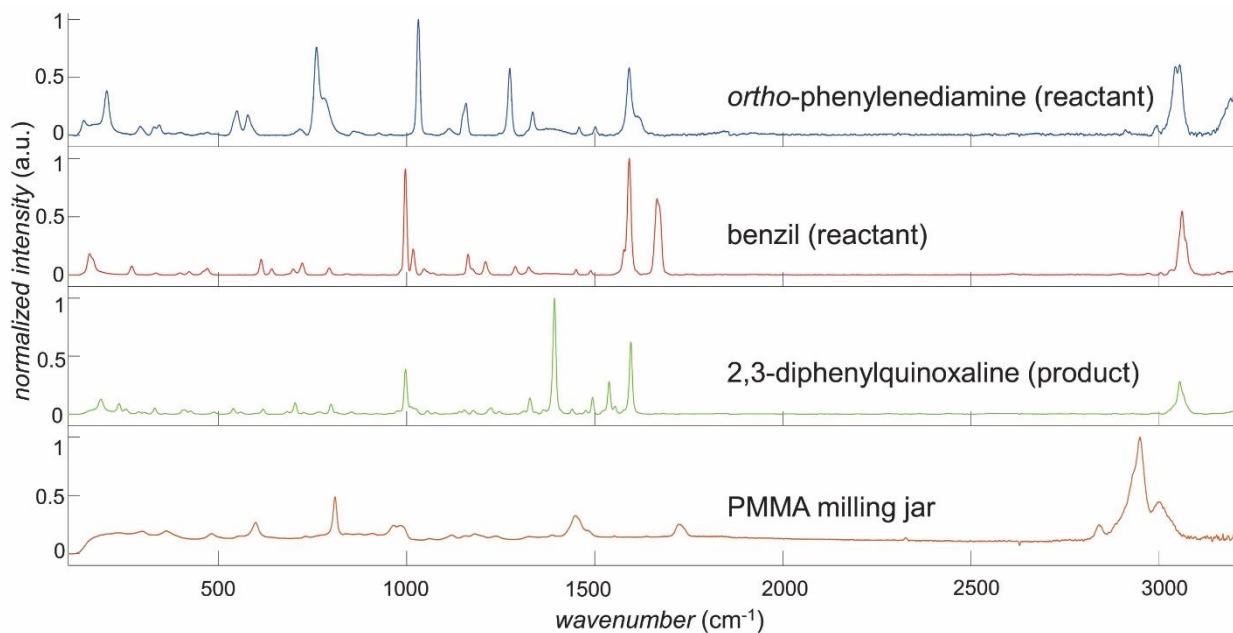

**Figure S1:** Relevant Raman spectra (top to bottom): reactant *ortho*-phenylenediamine; reactant benzil; product 2,3-diphenylquinoxaline and an empty PMMA milling jar.

## 2. Experimental setup

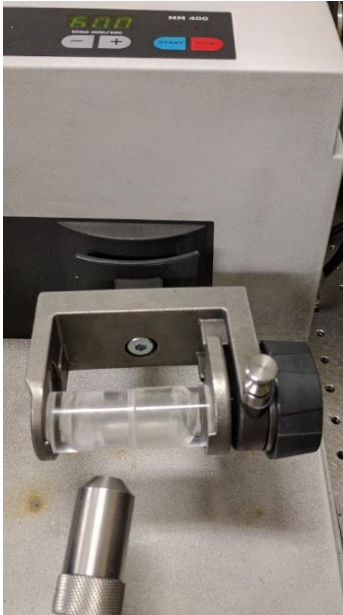

**Figure S2:** Picture of the experimental setup, showing a 15 mL volume PMMA jar mounted on a milling station of the Retsch MM400 mixer mill and the tip of the Raman spectroscopy probe.

### 3. Product characterization

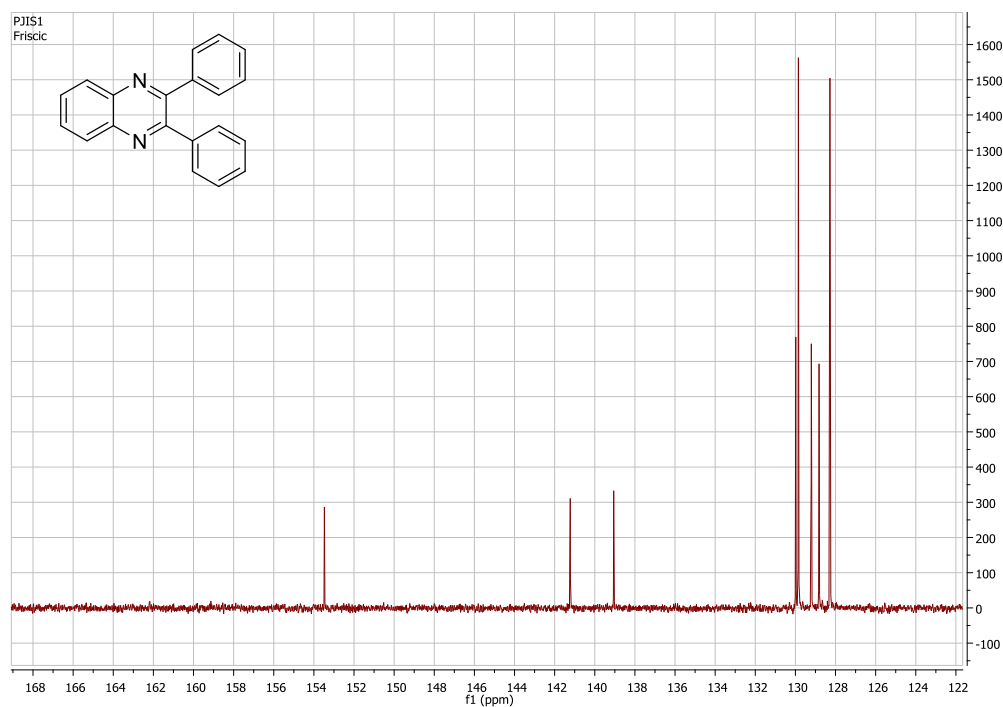

**Figure S3:** <sup>1</sup>H NMR spectrum of the crude 2,3-diphenylquinoxaline product obtained by mechanochemical reaction conducted at 30 Hz (30 Hz, Exp. 1), recorded in CDCl<sub>3</sub>. The spectrum reveals only trace impurities and matches the spectrum previously reported in the *Spectral Database for Organic Compounds (SDBS)*, SDBS No. 32951HSP-48-683.

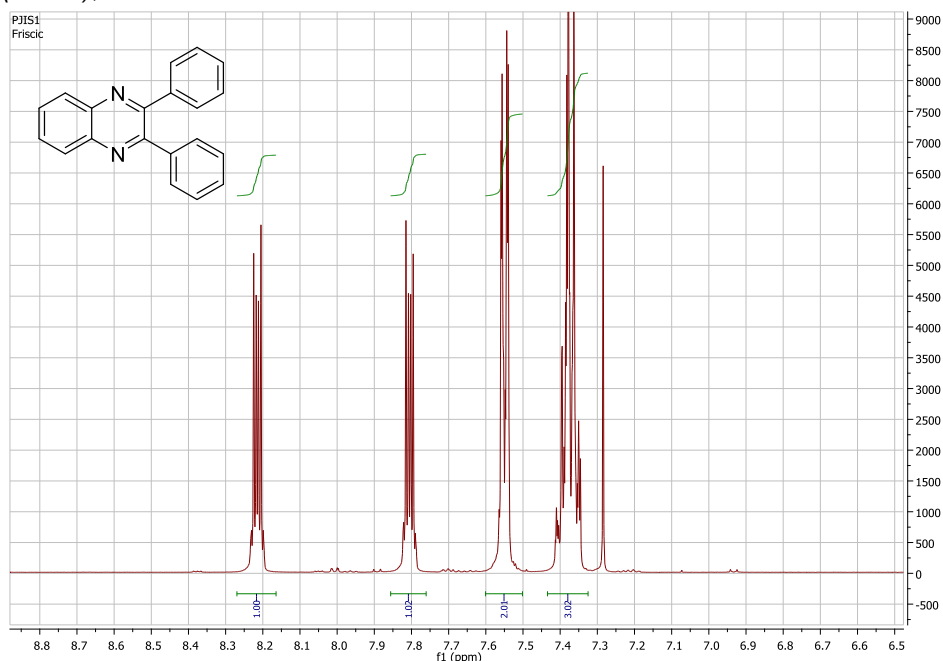

**Figure S4:** <sup>13</sup>C NMR spectrum of the crude 2,3-diphenylquinoxaline product obtained by mechanochemical reaction conducted at 30 Hz (30 Hz, Exp. 1), recorded in CDCl<sub>3</sub>. The spectrum reveals only trace impurities and matches the spectrum previously reported in the *Spectral Database for Organic Compounds (SDBS)*, SDBS No. 32951CDS-10-500

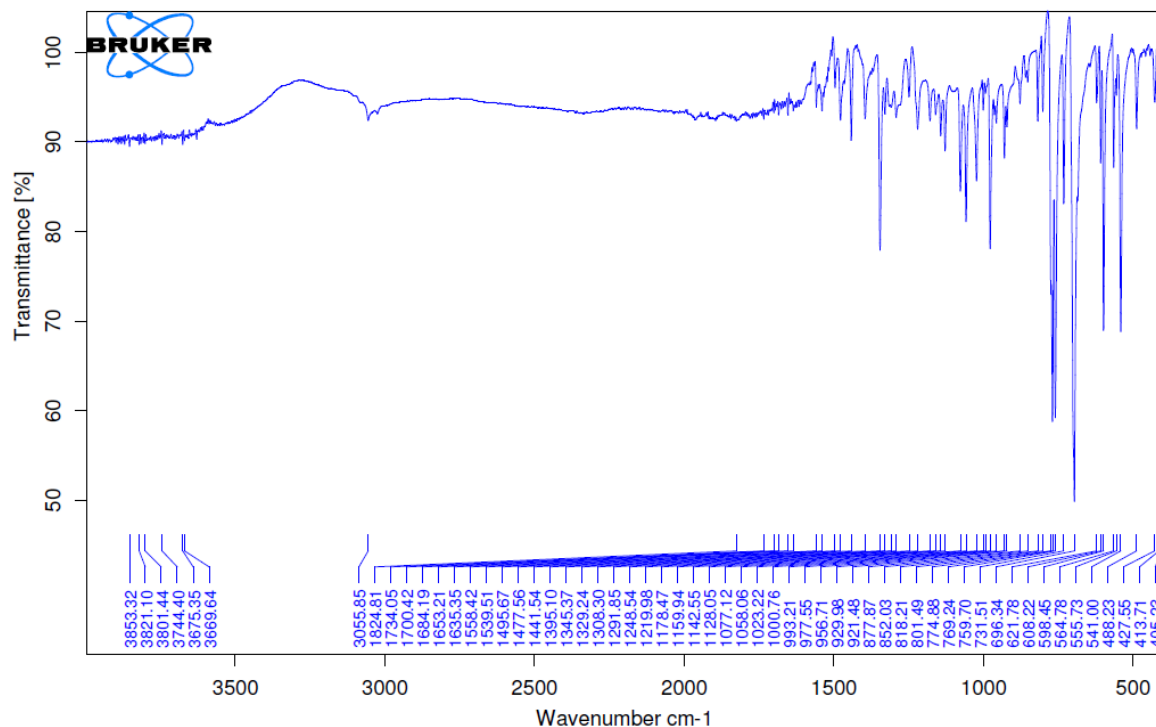

**Figure S5:** Fourier-transform infrared attenuated total reflectance (FTIR-ATR) spectrum of the crude 2,3-diphenylquinoxaline product obtained by mechanochemical reaction conducted at 30 Hz (30 Hz, Exp. 1). The spectrum matches the spectrum previously reported in the *Spectral Database for Organic Compounds (SDBS)*, SDBS No. 32951 IR-NIDA-74153.

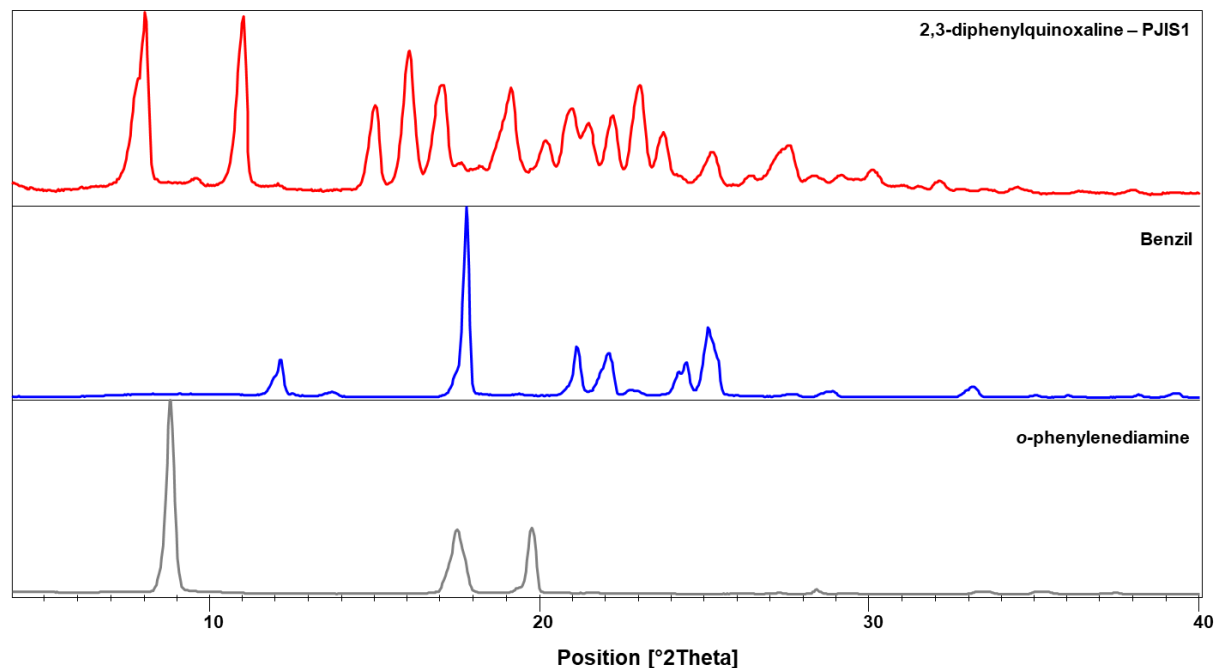

**Figure S6:** Example powder X-ray diffraction patterns for the mechanochemical synthesis of 2,3-diphenylquinoxaline (top to bottom): the crude product of the reaction conducted by ball milling at 30 Hz (30 Hz, Exp. 1); benzil reactant and reactant *ortho*-phenylenediamine.

**Table S1:** Reaction conversions, based on integration of <sup>1</sup>H NMR spectra of crude milling products. If starting material could not be detected, conversion is listed as 99+%

| Reaction Number | Frequency (Hz) and Experiment # | Conversion (%) |
|-----------------|---------------------------------|----------------|
| 1               | 30, Exp. 1                      | 99+            |
| 2               | 30, Exp. 2                      | 99+            |
| 3               | 30, Exp. 3                      | 99+            |
| 4               | 27.5, Exp. 1                    | 99+            |
| 5               | 27.5, Exp. 2                    | 99+            |
| 6               | 27.5, Exp. 3                    | 97.0           |
| 7               | 25, Exp. 1                      | 99+            |
| 8               | 25, Exp. 2                      | 98.0           |
| 9               | 25, Exp. 3                      | 99+            |
| 10              | 22.5, Exp. 1                    | 99+            |
| 11              | 22.5, Exp. 2                    | 99+            |
| 12              | 22.5, Exp. 3                    | 99+            |
| 13              | 20, Exp. 1                      | 79.5           |
| 14              | 20, Exp. 2                      | 74.5           |
| 15              | 20, Exp. 3                      | 83.0           |

#### 4) Spectroscopic data and fitting plots for all experiments

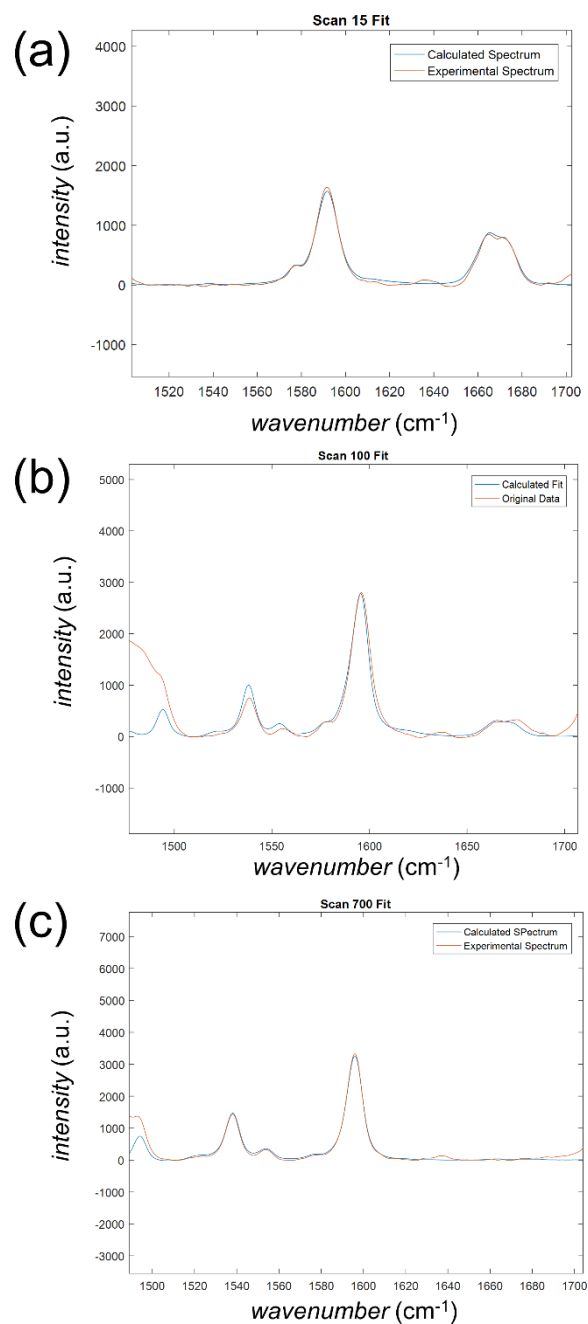

**Figure S7:** Comparison of experimental and calculated spectra for Experiment 1, 30 Hz (the complete dataset and residuals for this experiment are presented in the article, main paper): (a) scan #15 (after 75 seconds milling); (b) scan #100 (after 500 seconds milling) and (c) scan #700 (after 3500 seconds milling).

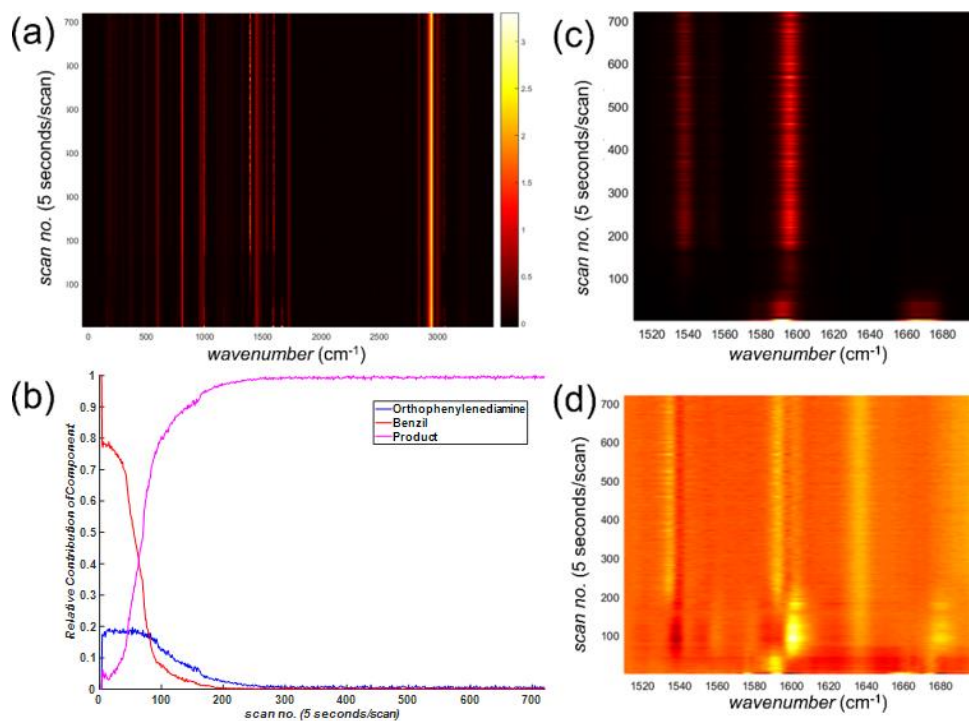

**Figure S8:** Data for Experiment 2, 30 Hz: (a) the entire time-resolved Raman spectrum for the second experiments conducted by milling at 30 Hz; (b) the associated time-dependent change in spectral contributions of the product (purple) and the two reactants (red and blue); (c) section of the spectrum selected for least-squares fitting and (d) the final residual spectrum.

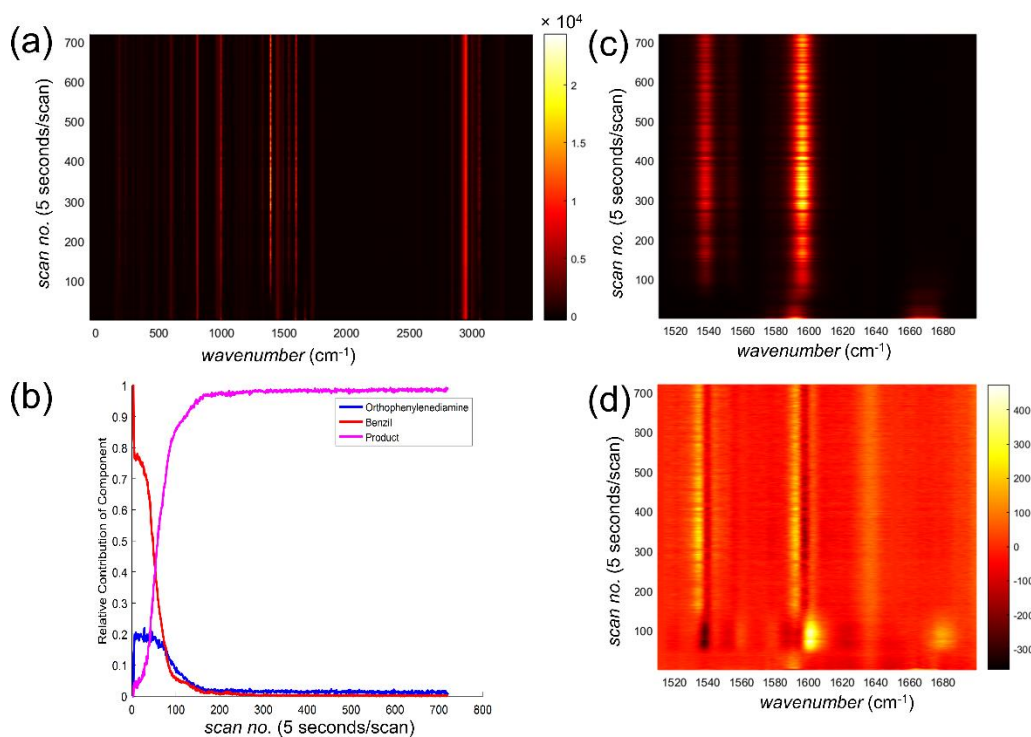

**Figure S9:** Data for Experiment 3, 30 Hz: (a) the entire time-resolved Raman spectrum for the third experiment conducted by milling at 30 Hz; (b) the associated time-dependent change in spectral contributions of the product (purple) and the two reactants (red and blue); (c) section of the spectrum selected for least-squares fitting and (d) the final residual spectrum.

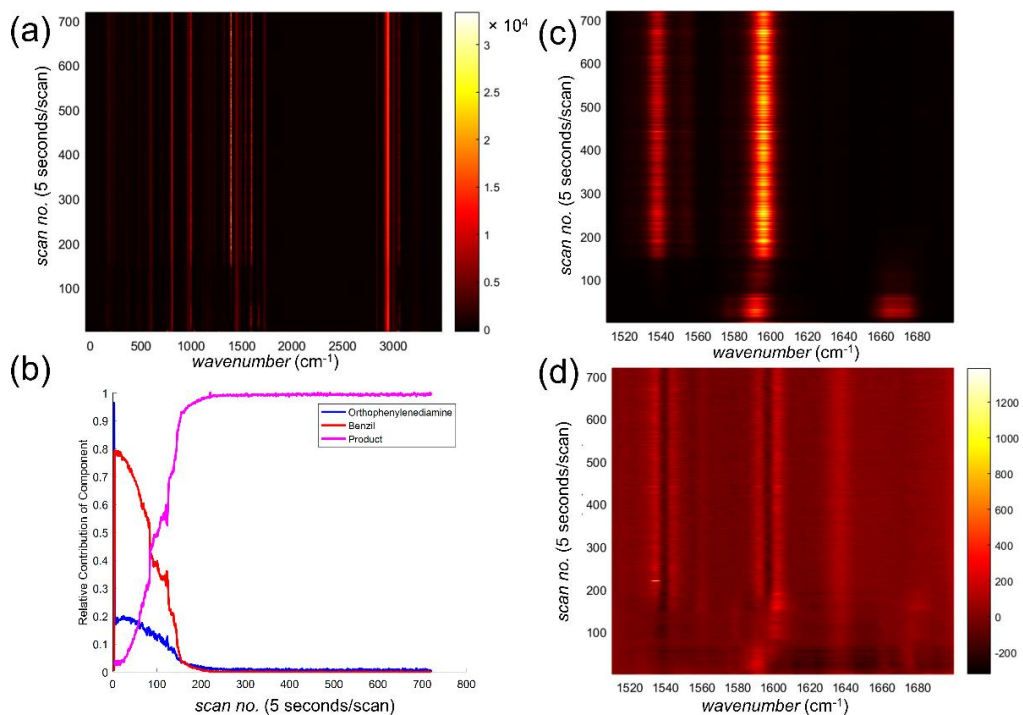

**Figure S10:** Data for Experiment 1, 27.5 Hz: (a) the entire time-resolved Raman spectrum for the first experiment conducted by milling at 27.5 Hz; (b) the associated time-dependent change in spectral contributions of the product (purple) and the two reactants (red and blue); (c) section of the spectrum selected for least-squares fitting and (d) the final residual spectrum.

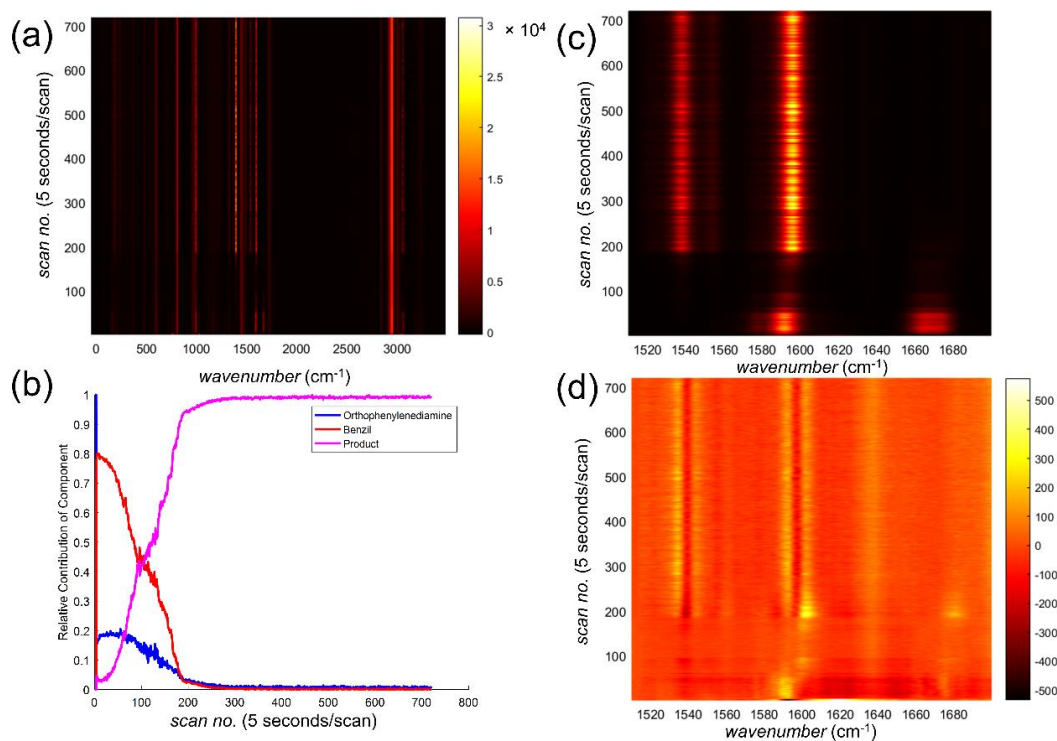

**Figure S11:** Data for Experiment 2, 27.5 Hz: (a) the entire time-resolved Raman spectrum for the second experiment conducted by milling at 27.5 Hz; (b) the associated time-dependent change in spectral contributions of the product (purple) and the two reactants (red and blue); (c) section of the spectrum selected for least-squares fitting and (d) the final residual spectrum.



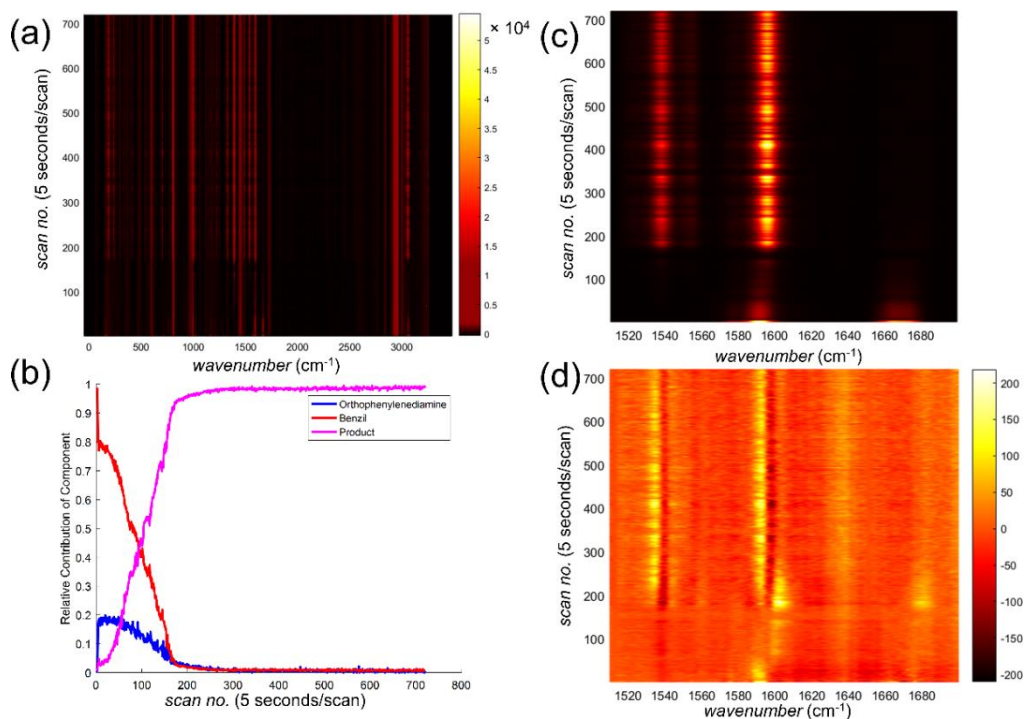

**Figure S12:** Data for Experiment 3, 27.5 Hz: (a) the entire time-resolved Raman spectrum for the third experiment conducted by milling at 27.5 Hz; (b) the associated time-dependent change in spectral contributions of the product (purple) and the two reactants (red and blue); (c) section of the spectrum selected for least-squares fitting and (d) the final residual spectrum.

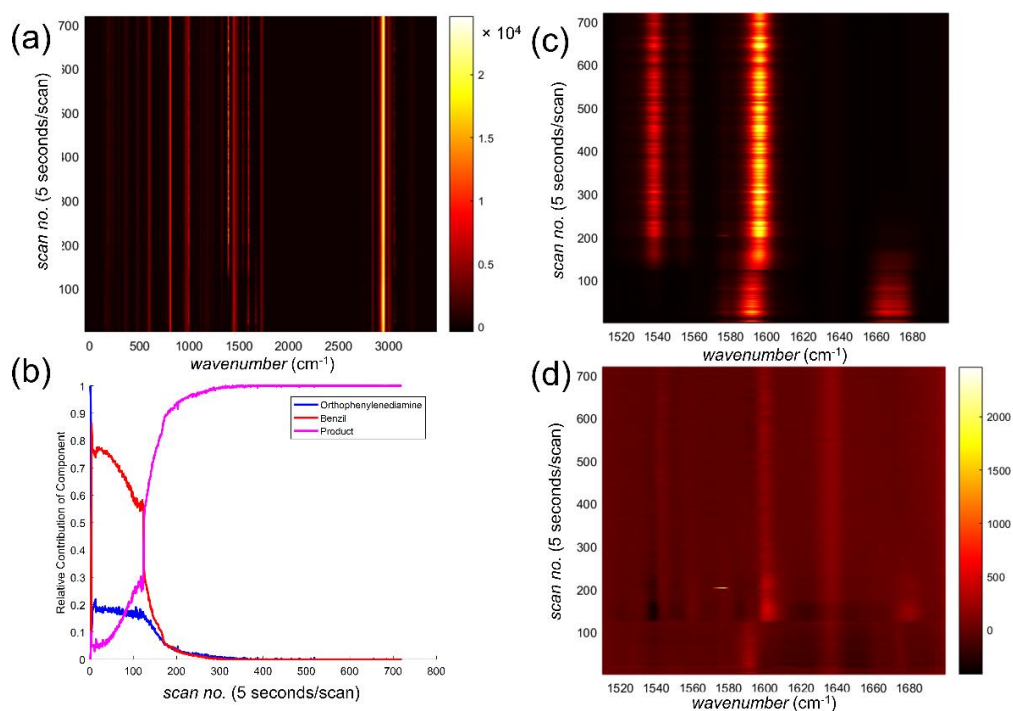

**Figure S13:** Data for Experiment 1, 25 Hz: (a) the entire time-resolved Raman spectrum for the first experiment conducted by milling at 25 Hz; (b) the associated time-dependent change in spectral contributions of the product (purple) and the two reactants (red and blue); (c) section of the spectrum selected for least-squares fitting and (d) the final residual spectrum.

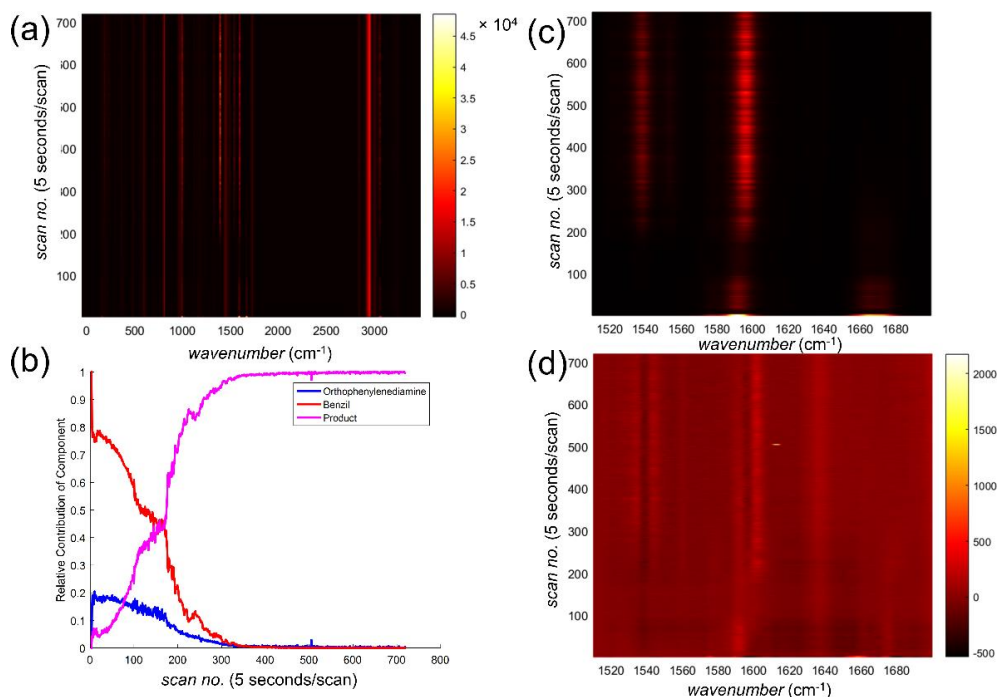

**Figure S14:** Data for Experiment 2, 25 Hz: (a) the entire time-resolved Raman spectrum for the second experiment conducted by milling at 25 Hz; (b) the associated time-dependent change in spectral contributions of the product (purple) and the two reactants (red and blue); (c) section of the spectrum selected for least-squares fitting and (d) the final residual spectrum.

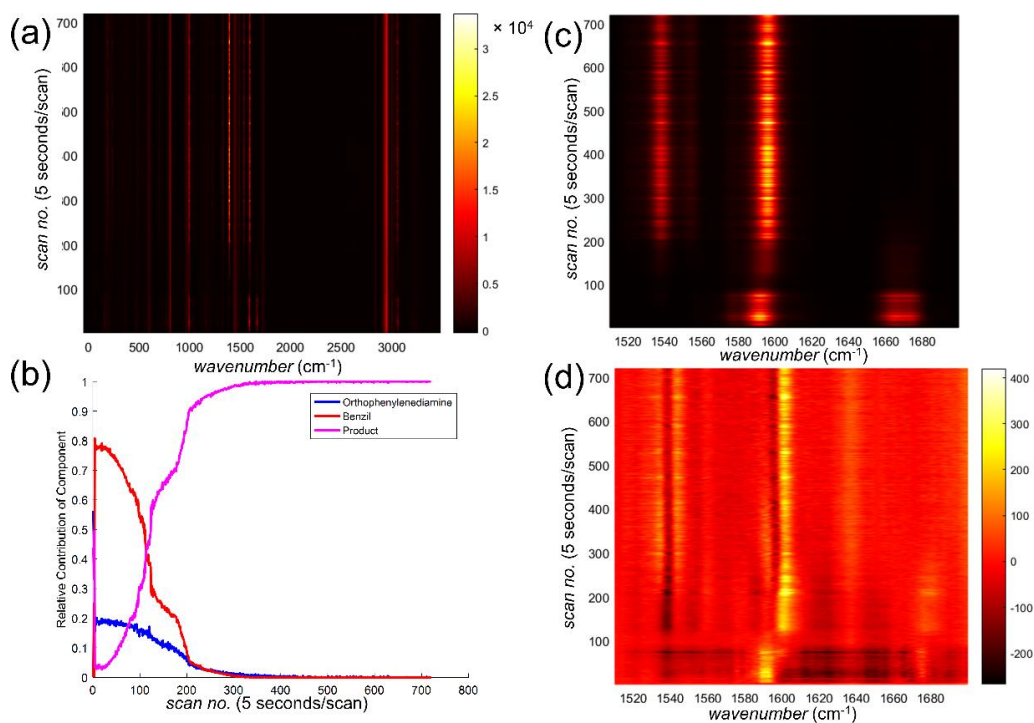

**Figure S15:** Data for Experiment 3, 25 Hz: (a) the entire time-resolved Raman spectrum for the third experiment conducted by milling at 25 Hz; (b) the associated time-dependent change in spectral contributions of the product (purple) and the two reactants (red and blue); (c) section of the spectrum selected for least-squares fitting and (d) the final residual spectrum.

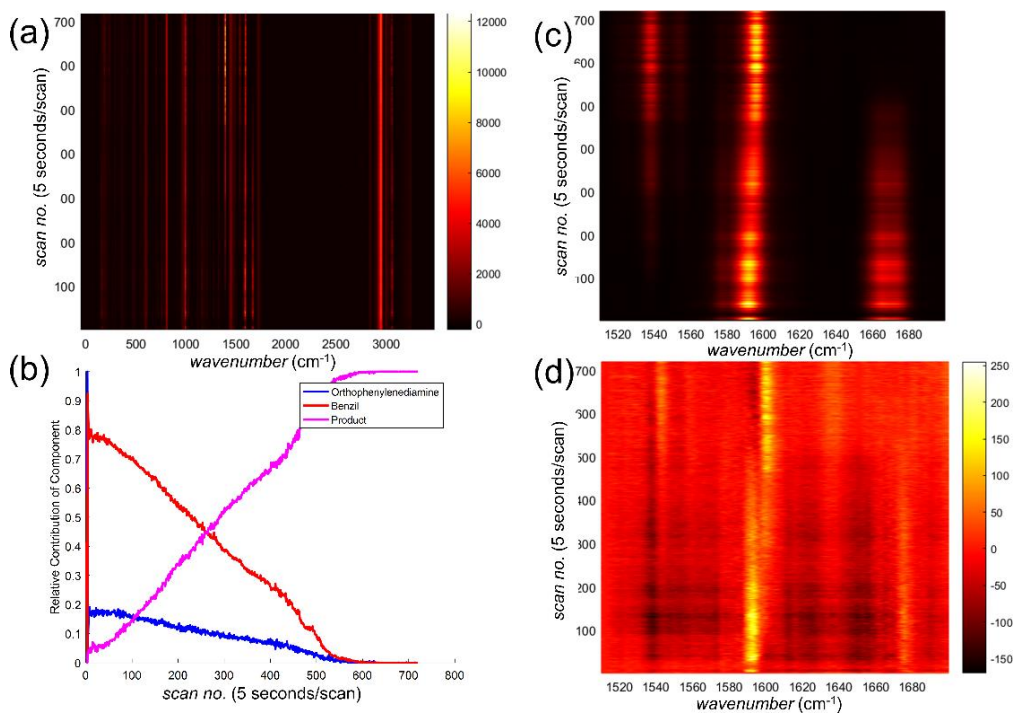

**Figure S16:** Data for Experiment 1, 22.5 Hz: (a) the entire time-resolved Raman spectrum for the first experiment conducted by milling at 22.5 Hz; (b) the associated time-dependent change in spectral contributions of the product (purple) and the two reactants (red and blue); (c) section of the spectrum selected for least-squares fitting and (d) the final residual spectrum.

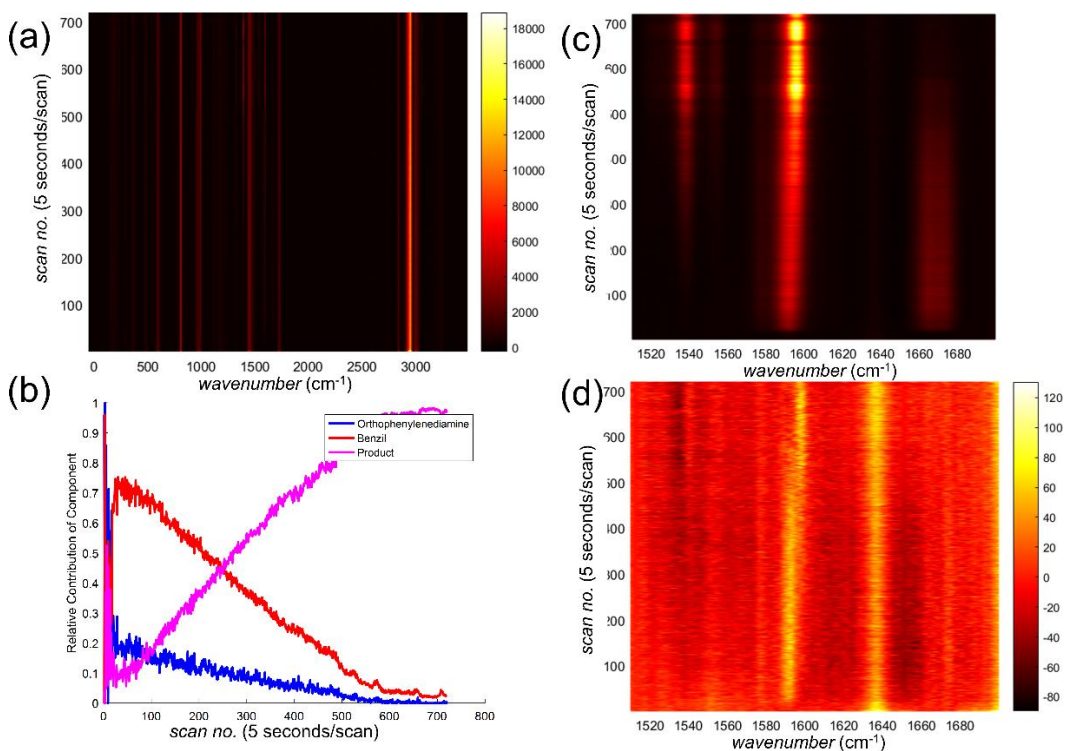

**Figure S17:** Data for Experiment 2, 22.5 Hz: (a) the entire time-resolved Raman spectrum for the second experiment conducted by milling at 22.5 Hz; (b) the associated time-dependent change in spectral contributions of the product (purple) and the two reactants (red and blue); (c) section of the spectrum selected for least-squares fitting and (d) the final residual spectrum.

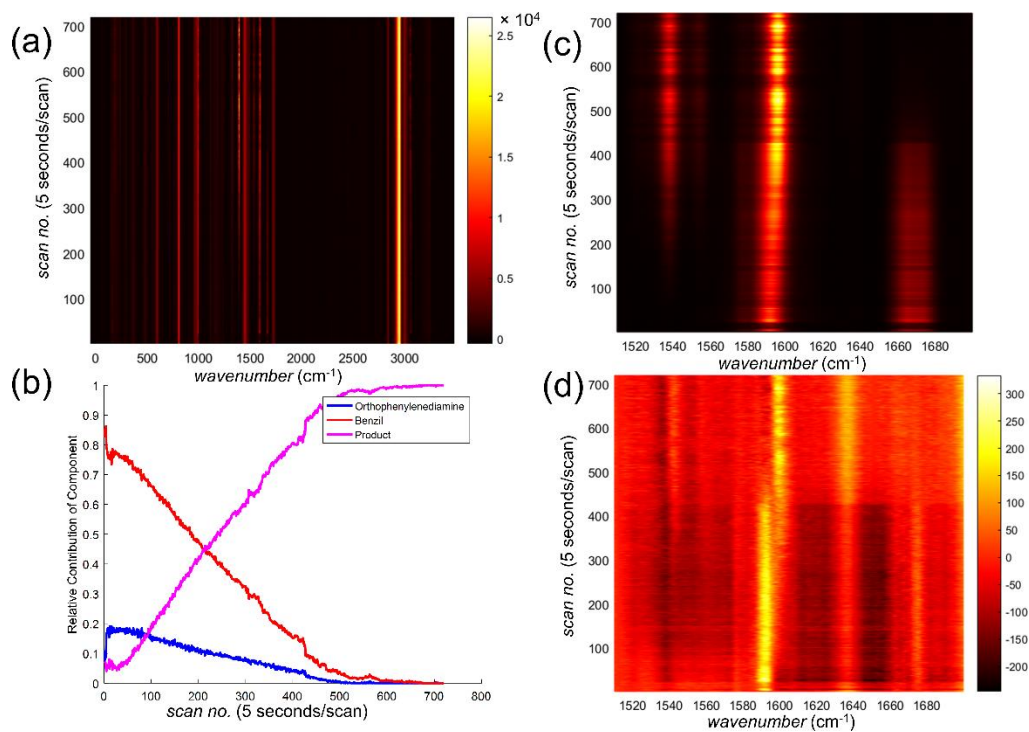

**Figure S18:** Data for Experiment 3, 22.5 Hz: (a) the entire time-resolved Raman spectrum for the third experiment conducted by milling at 22.5 Hz; (b) the associated time-dependent change in spectral contributions of the product (purple) and the two reactants (red and blue); (c) section of the spectrum selected for least-squares fitting and (d) the final residual spectrum.

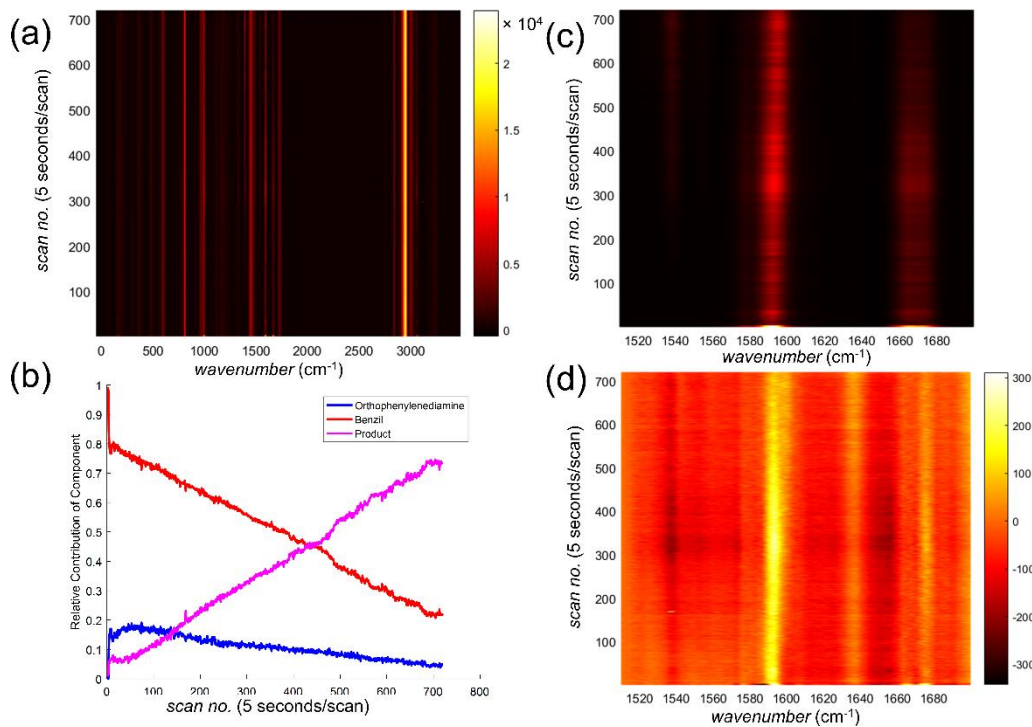

**Figure S19:** Data for Experiment 1, 20 Hz: (a) the entire time-resolved Raman spectrum for the first experiment conducted by milling at 20 Hz; (b) the associated time-dependent change in spectral contributions of the product (purple) and the two reactants (red and blue); (c) section of the spectrum selected for least-squares fitting and (d) the final residual spectrum.

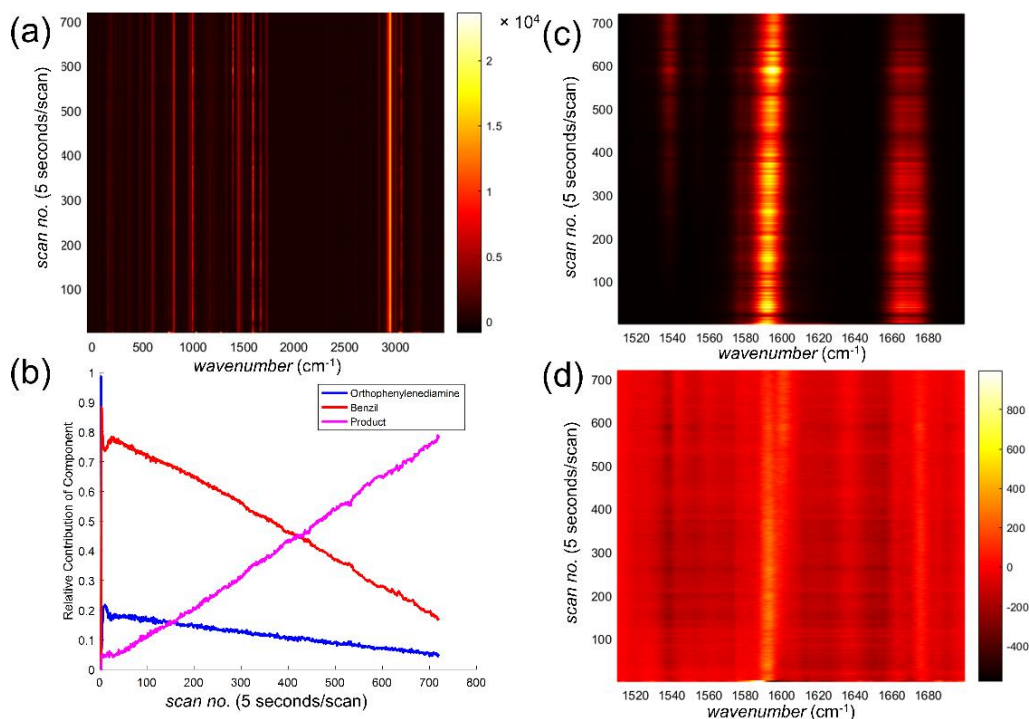

**Figure S20:** Data for Experiment 2, 20 Hz: (a) the entire time-resolved Raman spectrum for the second experiment conducted by milling at 20 Hz; (b) the associated time-dependent change in spectral contributions of the product (purple) and the two reactants (red and blue); (c) section of the spectrum selected for least-squares fitting and (d) the final residual spectrum.

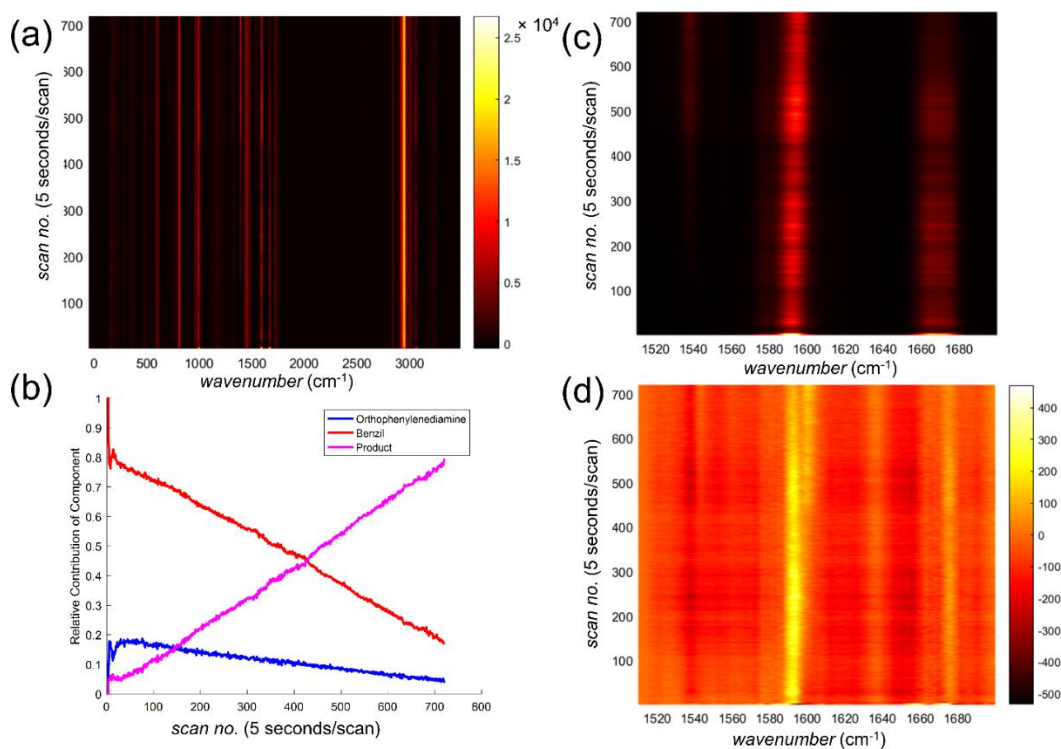

**Figure S21:** Data for Experiment 3, 20 Hz: (a) the entire time-resolved Raman spectrum for the third experiment conducted by milling at 20 Hz; (b) the associated time-dependent change in spectral contributions of the product (purple) and the two reactants (red and blue); (c) section of the spectrum selected for least-squares fitting and (d) the final residual spectrum.
